# Supplementary material
Source: MDPI journal article supplement (https://www.mdpi.com/2227-9040/10/1/24)
Supplement: s1 [file s1]

# SUPPLEMENTARY MATERIALS

## Sensors to the diagnostic assessment of anticancer and antimicrobial therapies effectiveness by drugs with pyrazine scaffold

Marta Domzalska <sup>1</sup>, Aleksandra M. Dąbrowska <sup>1</sup>, Dawid Chojnowski <sup>2</sup> and Mariusz Makowski <sup>1,\*</sup> Agnieszka Chylewska <sup>1,\*</sup>

<sup>1</sup> University of Gdańsk, Faculty of Chemistry, Department of Bioinorganic Chemistry, Wita Stwosza 63, 80-308 Gdańsk, Poland

<sup>2</sup> Keyence International, Irysowa 1, 55-040 Kobierzyce, Bielany Wrocławskie

\* Correspondence: agnieszka.chylewska@ug.edu.pl (A.C.); mariusz.makowski@ug.edu.pl (M.M.)

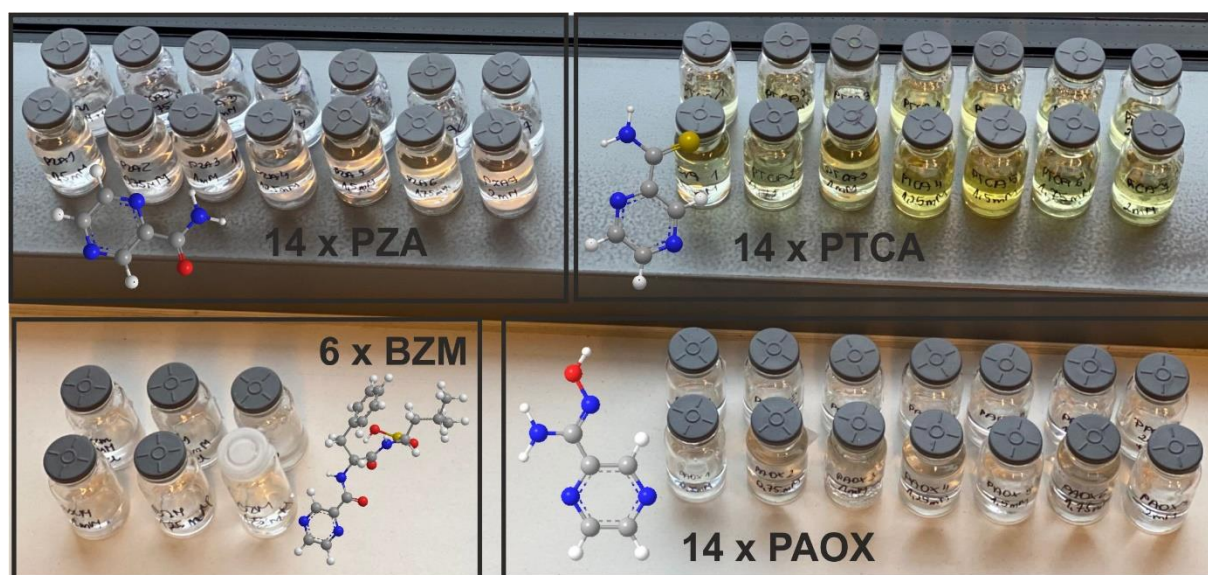

**Figure S1.** Pyrazine derivatives were prepared in the form of aqueous solutions (concentration range 0.50-2.00 mM with a gradient of 0.25 units) to plot calibration curves used successively for specific tests with the use of polyamine acid GCE sensors.

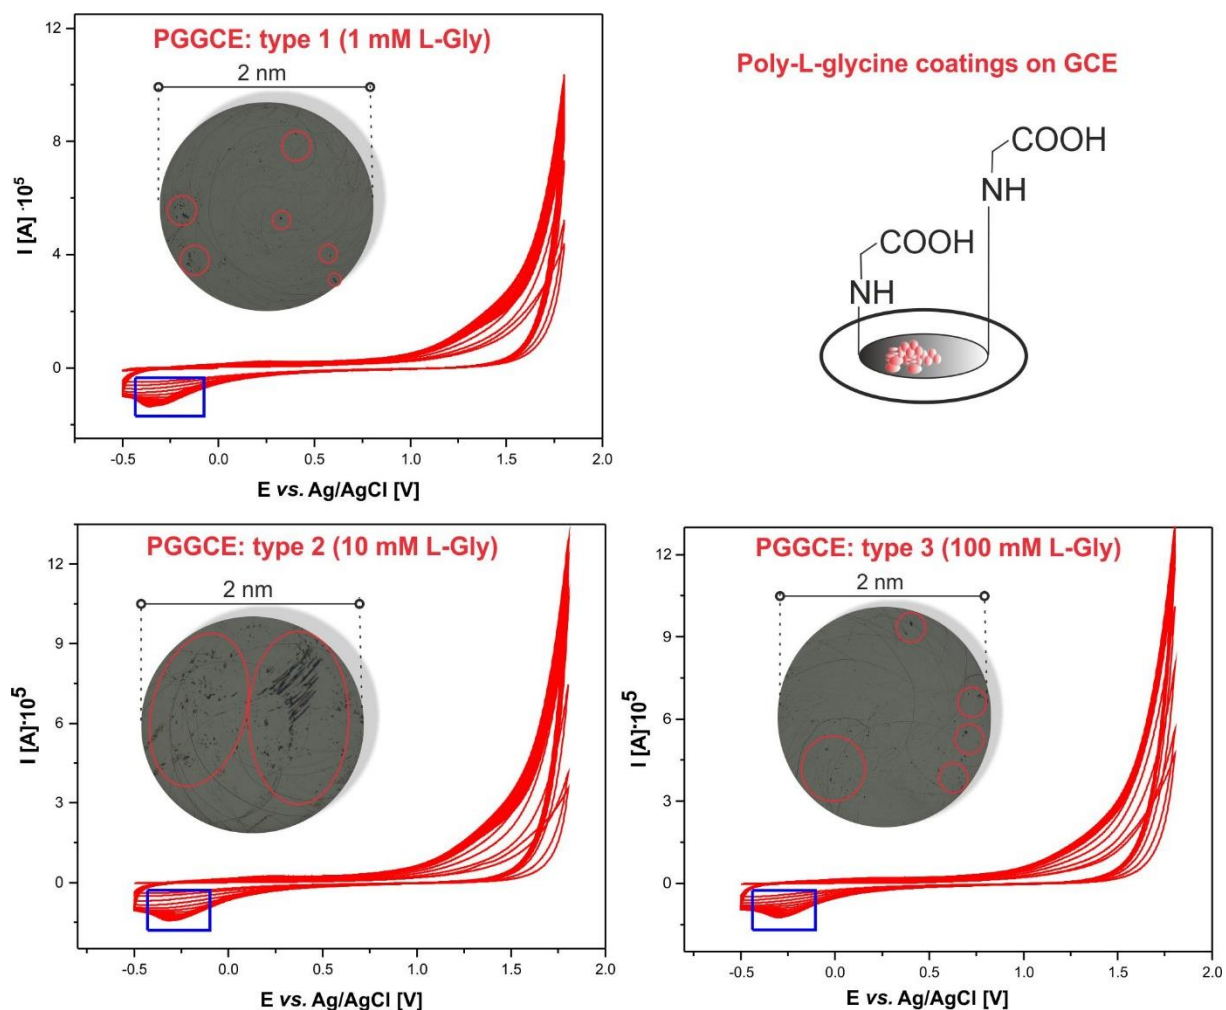

**Figure S2.** The effects of carrying out the GCE electropolymerization process in three L-Gly modifier systems (areas marked in blue frame indicate a significant range of surfaces with confirmed poly-forms obtained as a result of the modification).

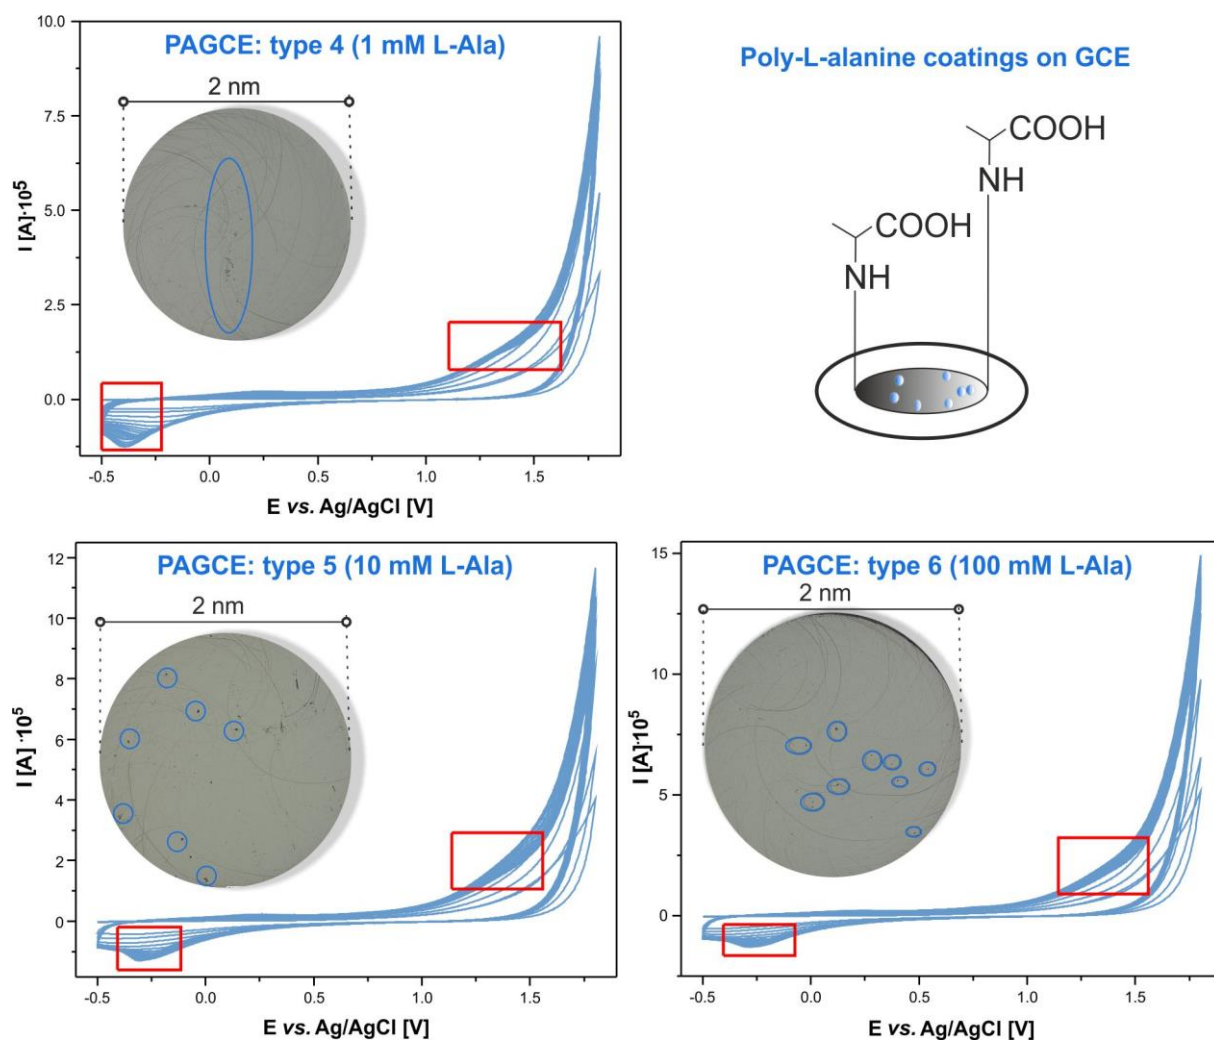

**Figure S3.** The effects of carrying out the GCE electropolymerization process in three L-Ala modifier systems (areas marked in the red frame indicate a significant range of surfaces with confirmed poly-forms obtained as a result of the modification).

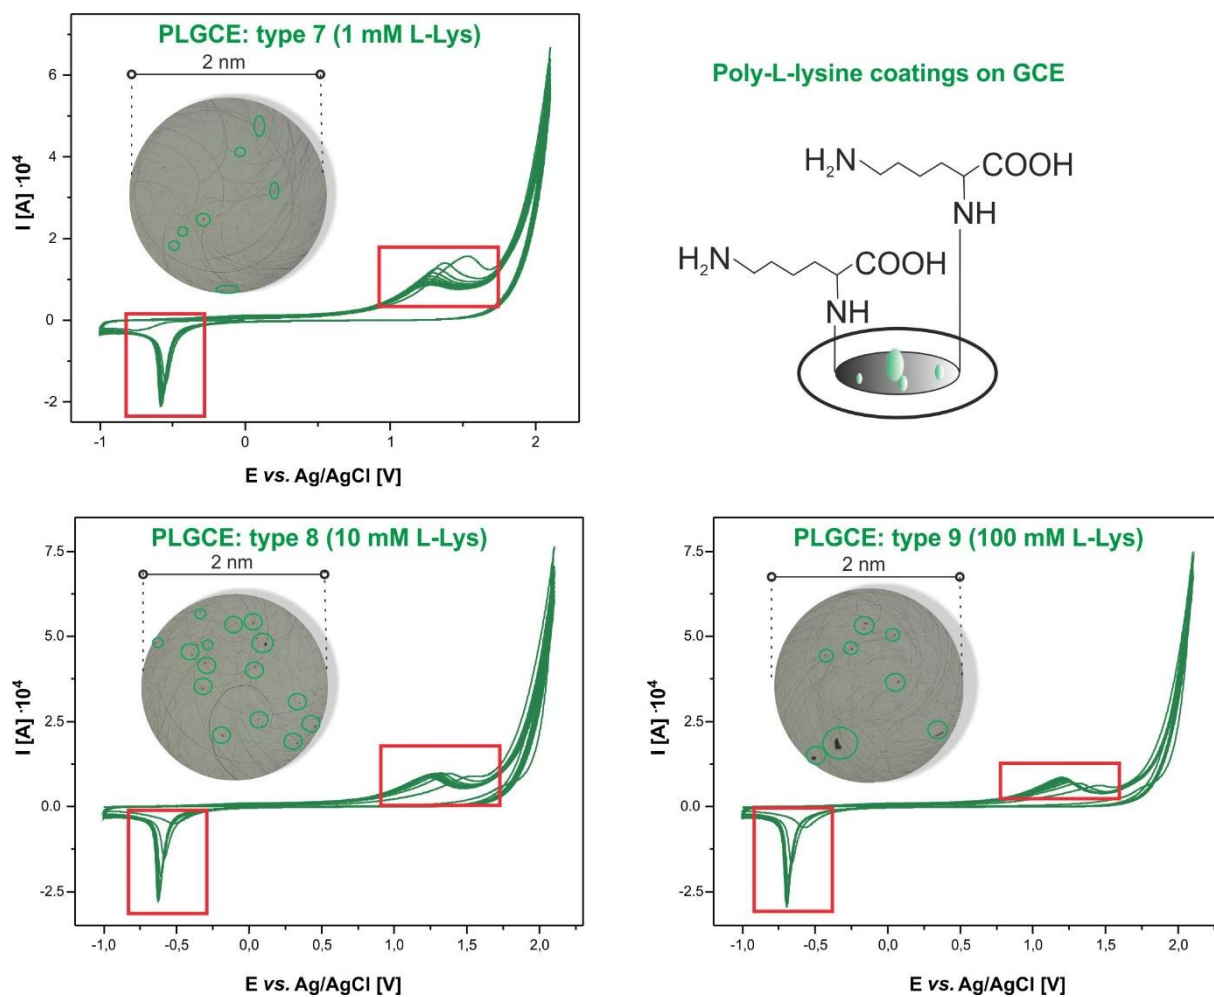

**Figure S4.** The effects of carrying out the GCE electropolymerization process in three L-Lys modifier systems (areas marked in green frame indicate a significant range of surfaces with confirmed poly-forms obtained as a result of the modification).

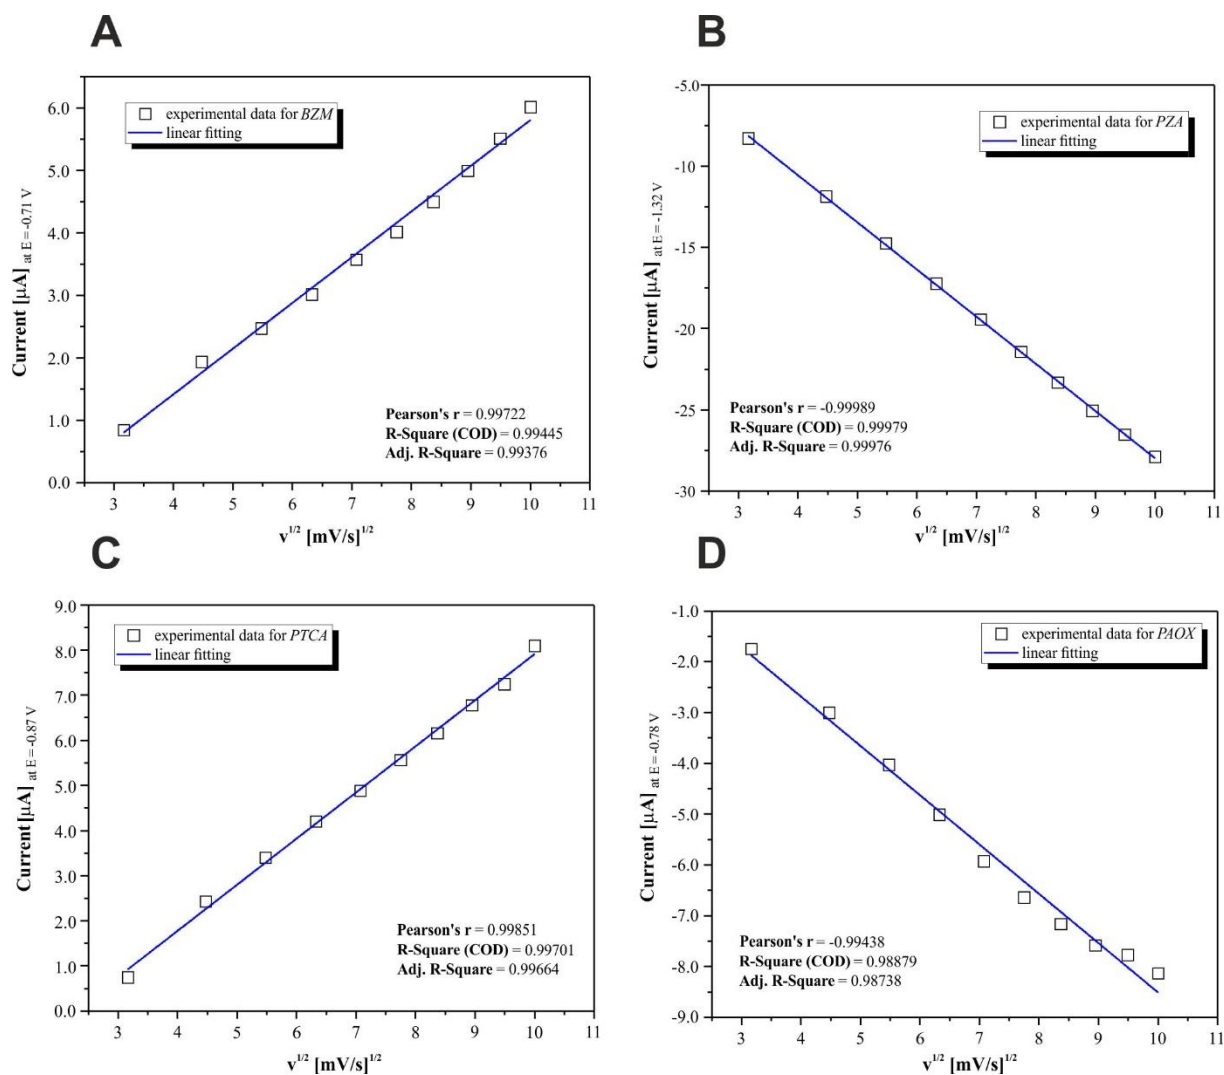

**Figure S5.** Plots of current peak vs. square root of scan rate obtained to prove that electrochemical reaction on GCE is diffusion-controlled in the case of all analytes studied: BZM (A), PZA (B), PTCA (C), PAOX (D).



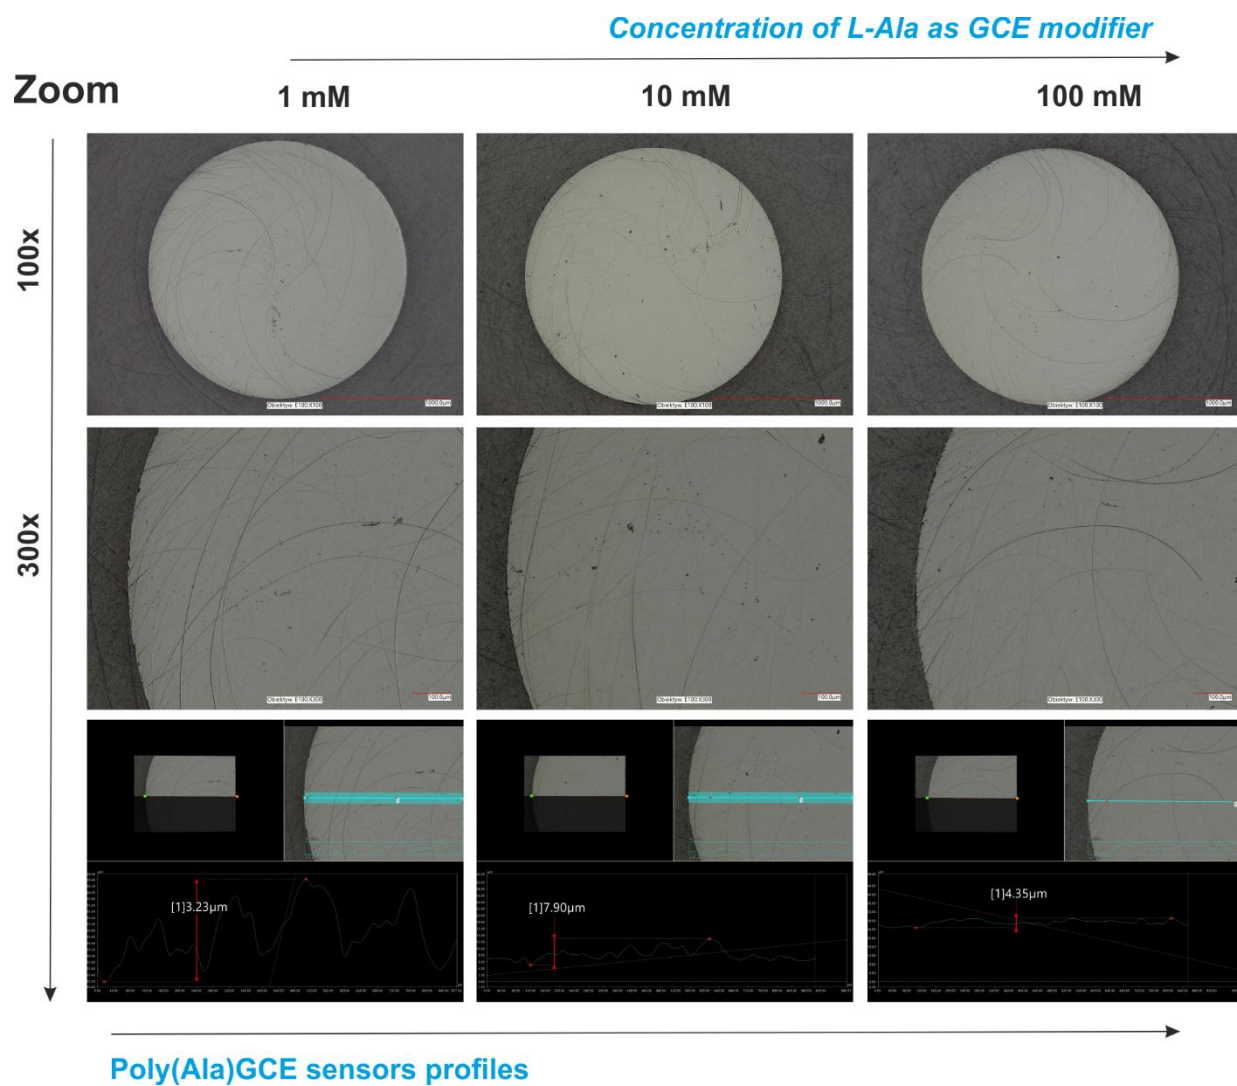

**Figure S6.** Microscopic imaging (two first rows) combined with the surface profiles of PAGCE sensors (third row).

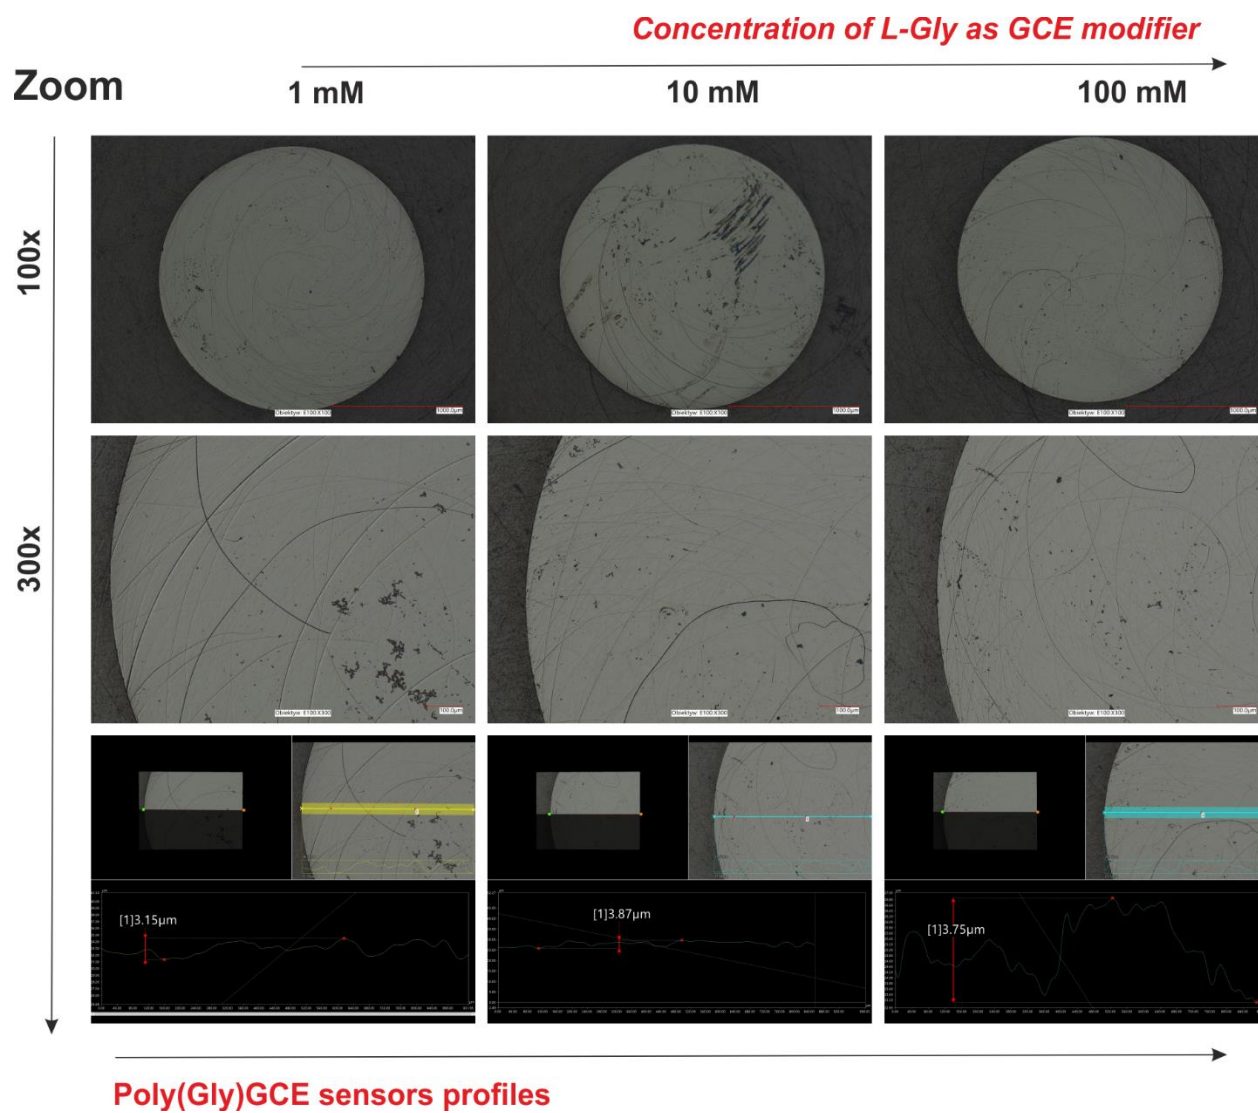

**Figure S7.** Microscopic imaging (two first rows) combined with the surface profiles of PGGCE sensors (third row).

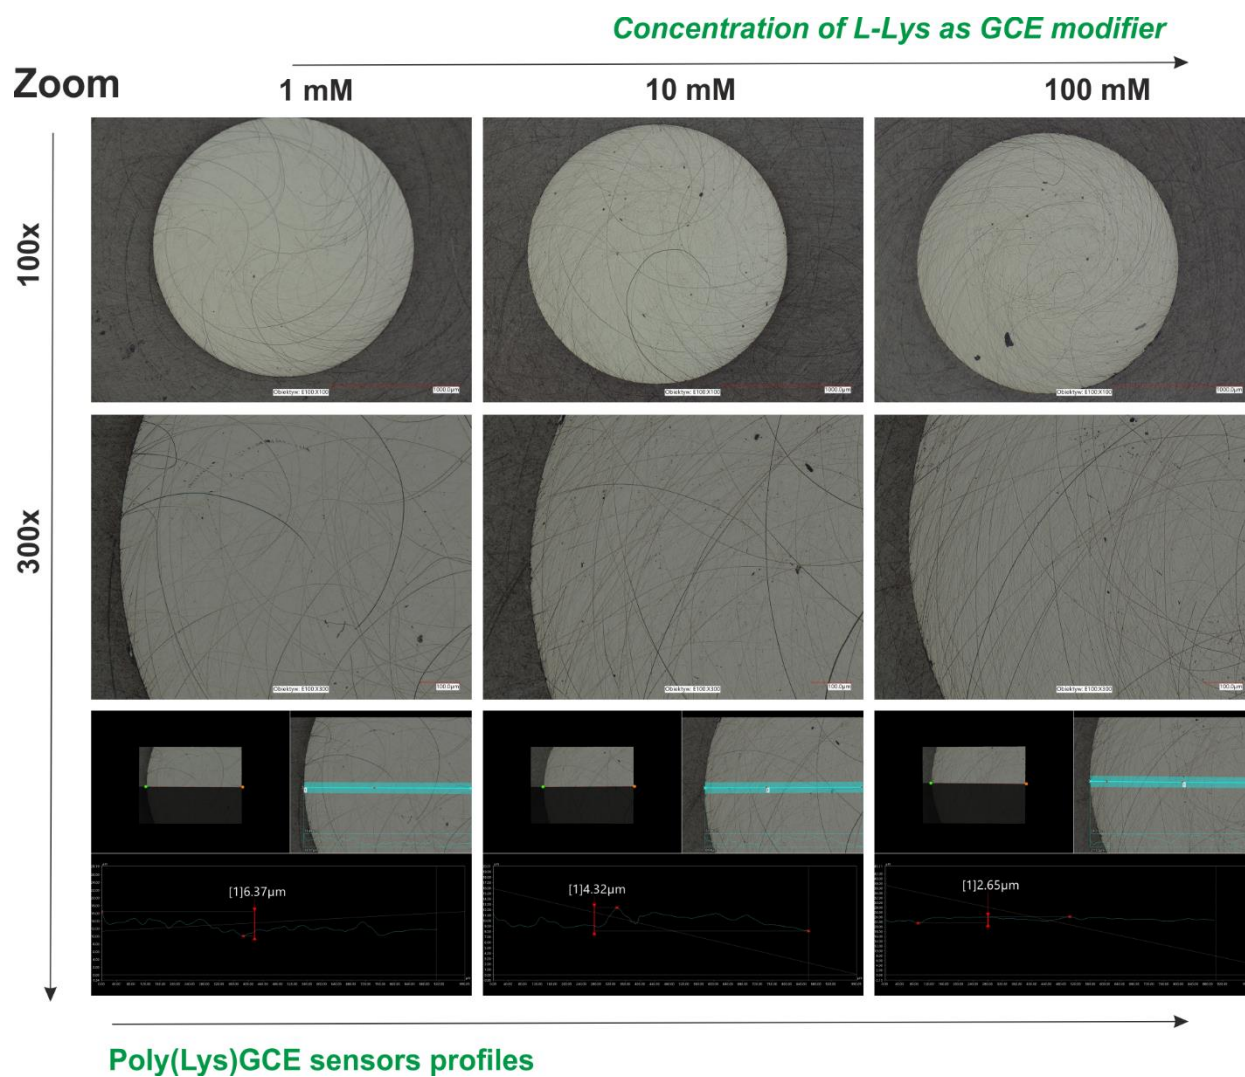

**Figure S8.** Microscopic imaging (two first rows) combined with the surface profiles of PLGCE sensors (third row).



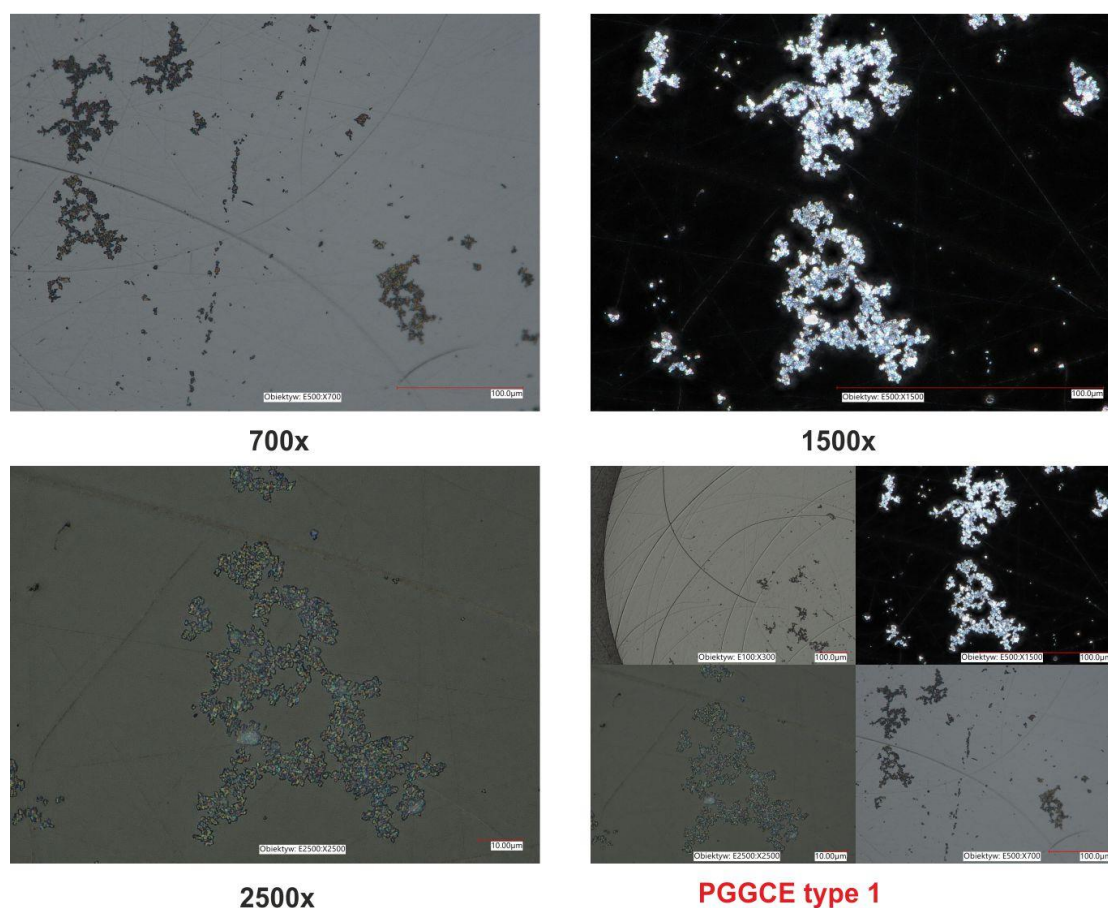

**Figure S9.** Images in magnification of the largest modification by volume - poly-L-glycine coating produced on the GCE surface, showing increased efficiency and sensitivity of detection of pyrazine derivatives in pharmaceuticals (*BZM*, *PZA*) and model systems (*PTCA*, *PAOX*).

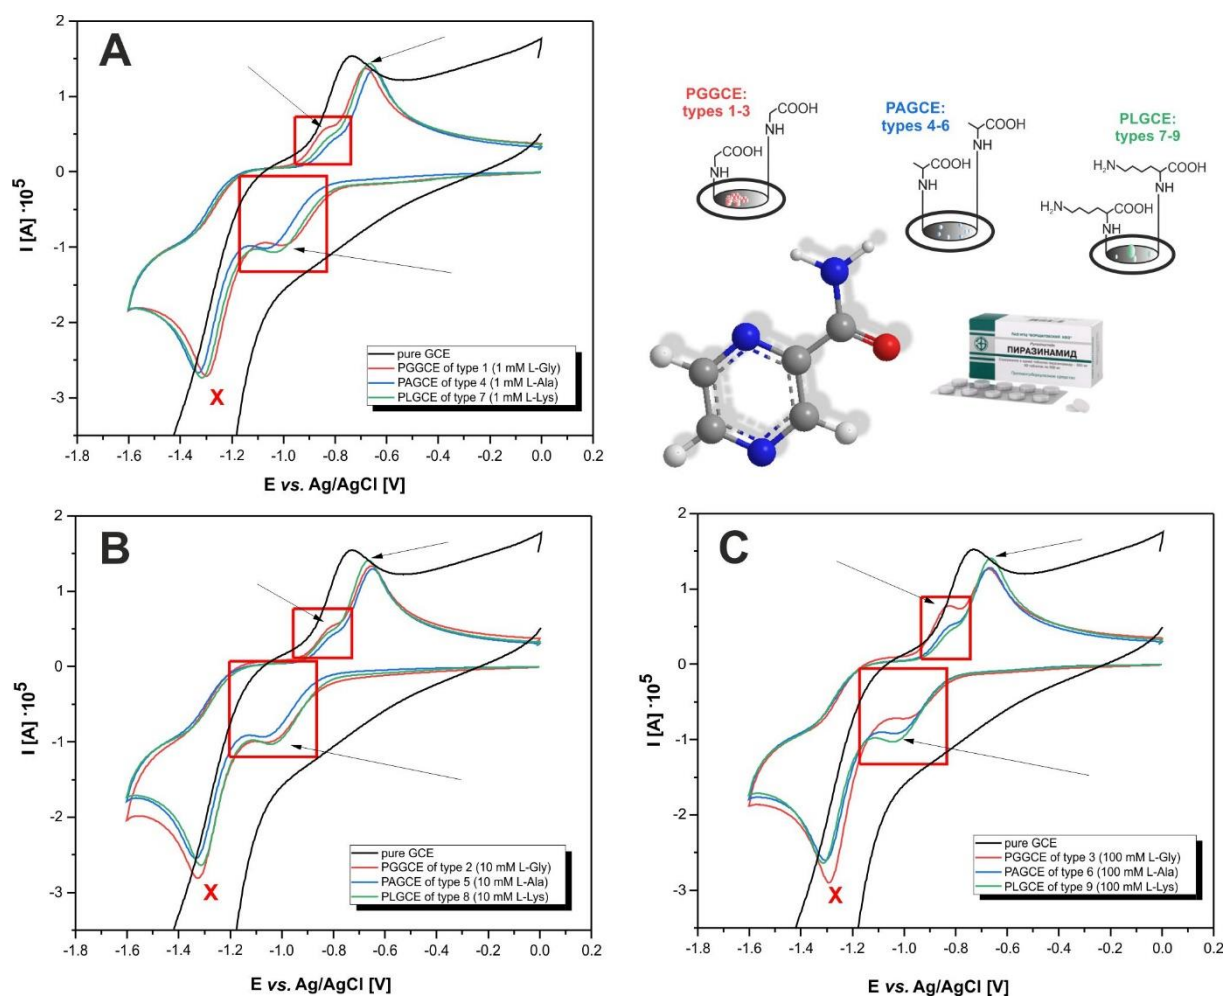

**Figure S10.** Cyclic voltammograms registered by 9 types of sensors were obtained for the PZA (2.00 mM solution) stoichiometric analyses which are commercially available and used as an anti-tuberculosis drug.

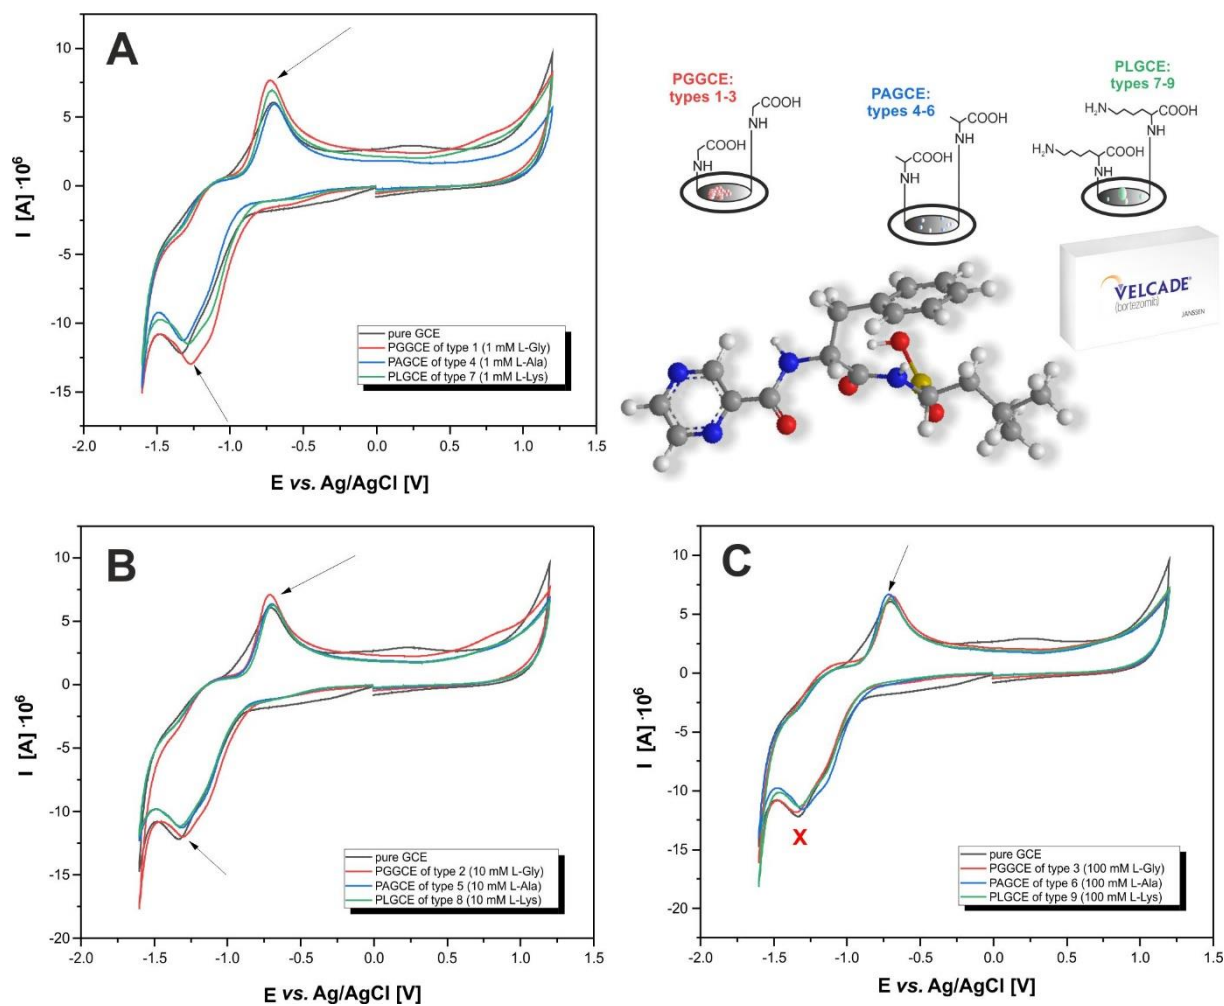

**Figure S11.** Cyclic voltammograms registered by 9 types of sensors obtained for the *BZM* (1.25 mM solution) stoichiometric analyses which are commercially available and used as an anticancer drug.

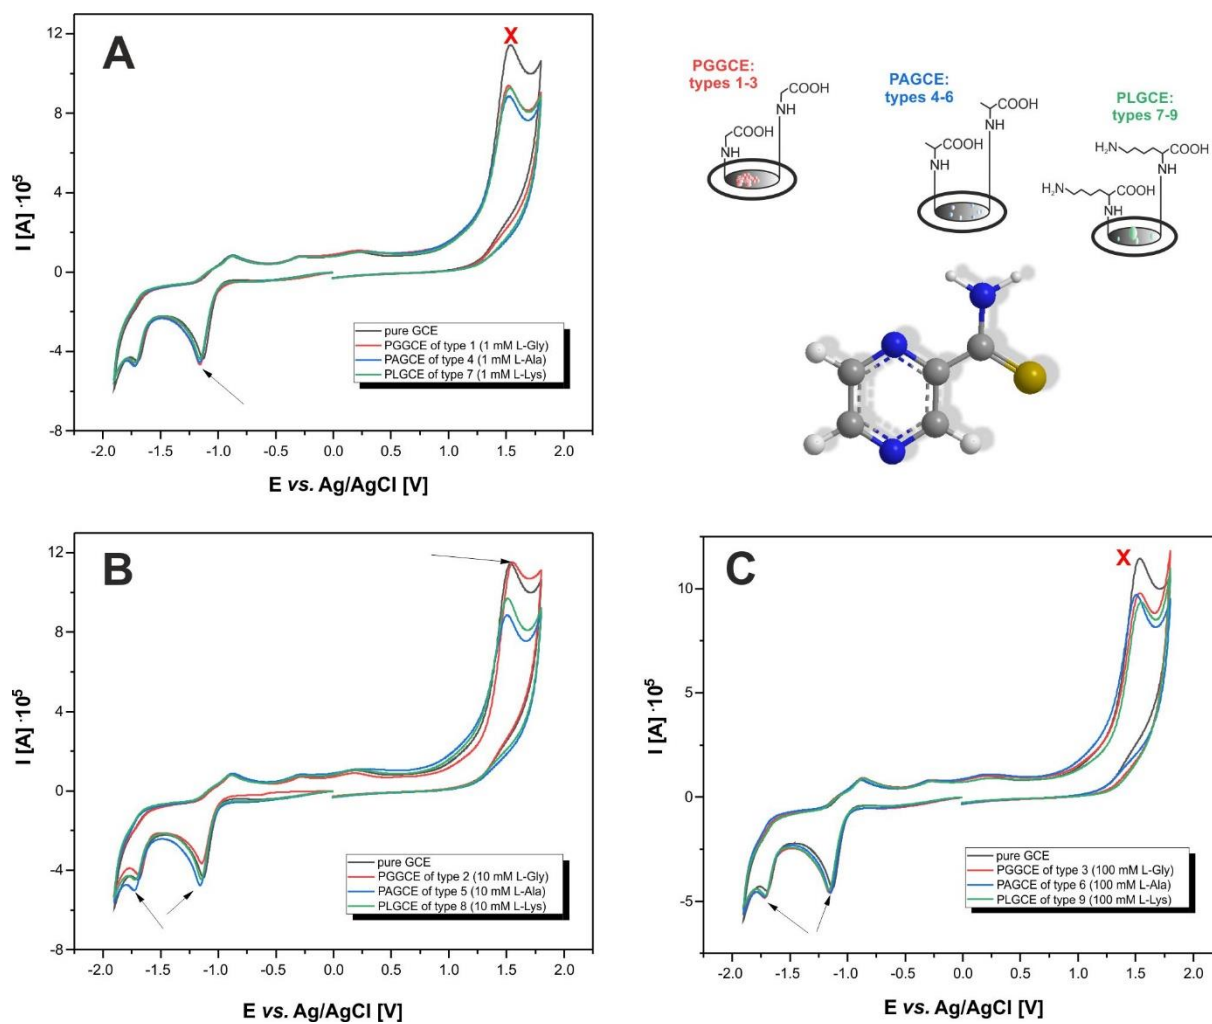

**Figure S12.** Cyclic voltammograms registered by 9 types of sensors were obtained for the PTCA (2.00 mM solution) stoichiometric analyses which show antimycotic properties [SR1].

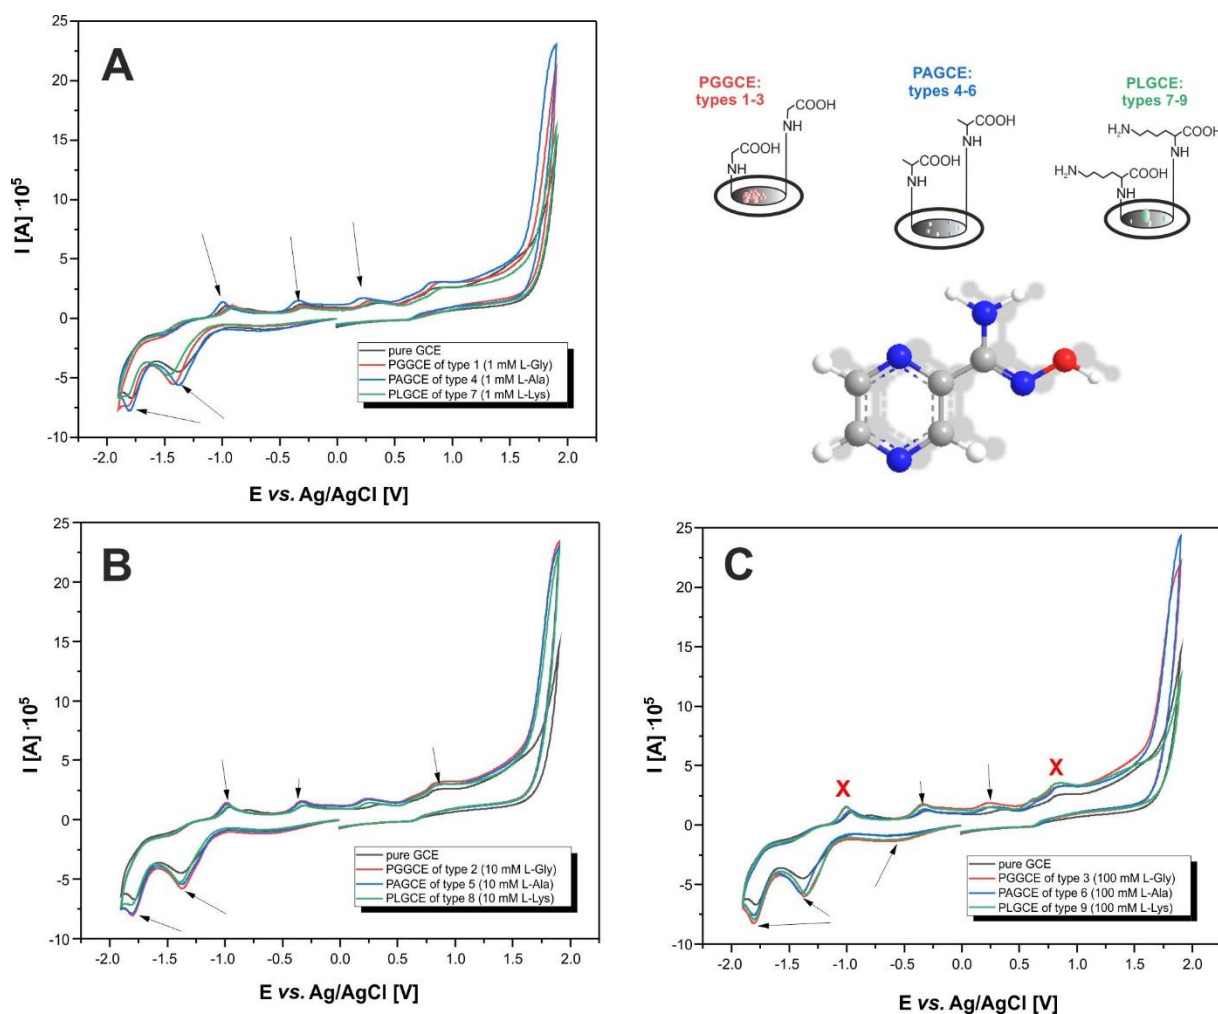

**Figure S13.** Cyclic voltammograms registered by 9 types of sensors were obtained for the PAOX (2.00 mM solution) stoichiometric analyses which show antimycotic properties with selective action against *Candida albicans* [SR2].

## SUPPORTING REFERENCES

- [SR1] A. Chylewska, A. Sikorski, M. Ogryzek, M. Makowski, Attractive S $\cdots\pi$  and  $\pi$ - $\pi$  interactions in the pyrazine-2-thiocarboxamide structure: Experimental and computational studies in the context of crystal engineering and microbiological properties, *Journal of Molecular Structure*, 2016, 1105, 96-104, <https://doi.org/10.1016/j.molstruc.2015.10.032>
- [SR2] A. Chylewska, PAOX, RSC Adv. 2016, A. Chylewska, M. Ogryzek, A. Głębocka, A. Sikorski, K. Turecka, E. D. Raczyńska, M. Makowski, Crystalline pyrazine-2-amidoxime isolated by diffusion method and its structural and behavioral analysis in the context of crystal engineering and microbiological activity, *RSC Adv.* 2016, 6, 64499 - 64512, [DOI:10.1039/C6RA10537H](https://doi.org/10.1039/C6RA10537H)
